# Supplementary material for: Free standing TiO2 nanotube array electrodes with an ultra-thin Al2O3 barrier layer and TiCl4 surface modification for highly efficient dye sensitized solar cells
Source: Royal Society of Chemistry journal article supplement (doi:10.1039/c3nr03198e), 2013-01-01
Supplement: c3nr03198e.pdf [file c3nr03198e.pdf]

# Supplementary Information

## Free Standing TiO<sub>2</sub> Nanotube Array Electrodes with Ultra-Thin Al<sub>2</sub>O<sub>3</sub> Barrier Layer and TiCl<sub>4</sub> Surface Modification for High Efficiency Dye Sensitized Solar Cells

Xianfeng Gao, Dongsheng Guan, Jingwan Huo, Junhong Chen, Chris Yuan\*

Department of Mechanical Engineering, University of Wisconsin Milwaukee, WI  
53201, USA

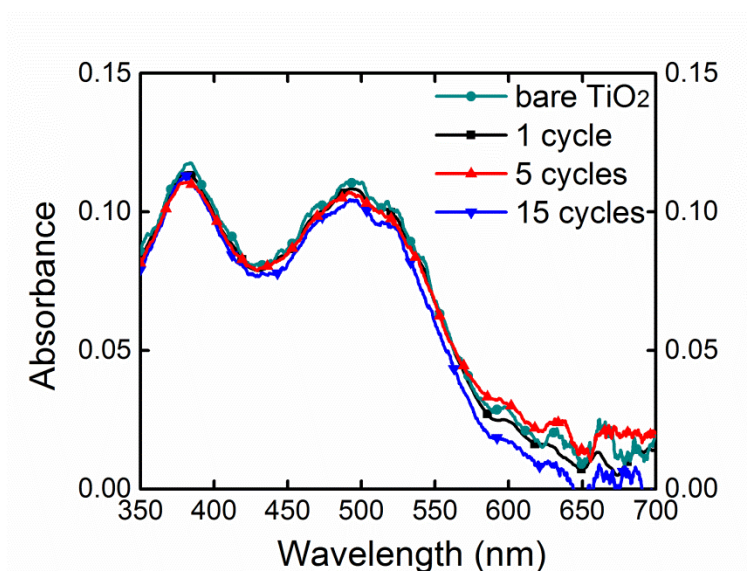

Figure S1 UV-Vis spectra of desorbed N719 dyes from TiO<sub>2</sub> electrodes with and without Al<sub>2</sub>O<sub>3</sub> barrier layer.
